# Supplementary material
Source: PubMed Central journal article supplement (PMC4038741)
Supplement: NIHMS583017-supplement-SI_Figures.pdf [file NIHMS583017-supplement-SI_Figures.pdf]

# Mechanisms of tumor cell extravasation in an *in vitro* microvascular network platform

Michelle B. Chen,<sup>a</sup> Jordan A. Whisler,<sup>a</sup> Jessie S. Jeon<sup>a</sup> and Roger D. Kamm<sup>a,b</sup>

## Supplementary Figures

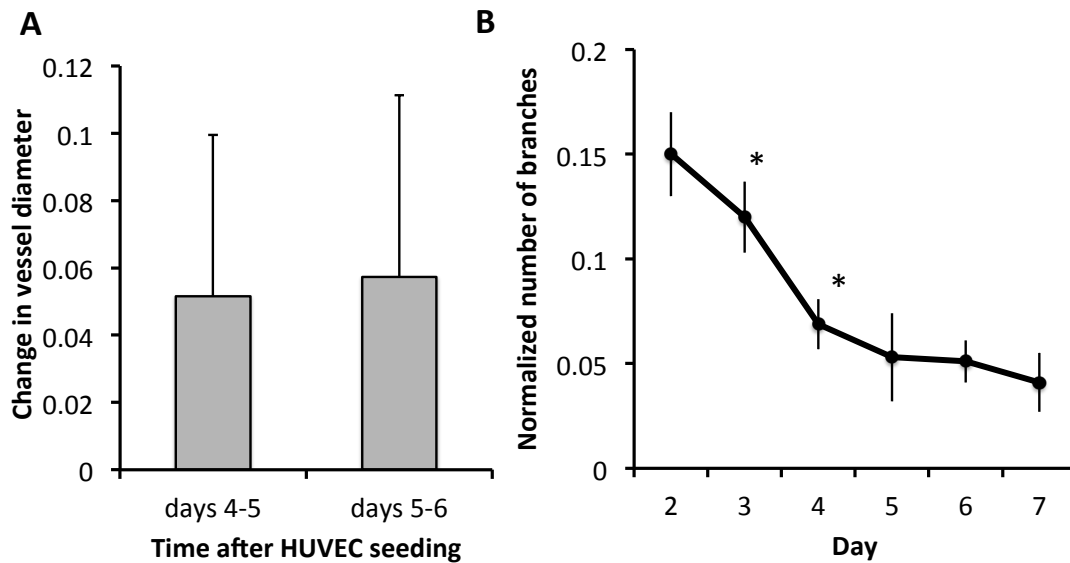

**Figure S1. Formation of microvascular networks in microfluidic devices.** (A) Change in individual vessel diameters (n=40 vessels) during time frame of extravasation experiments (days 4 to 6). (B) Changes in total vessel branches normalized by the total number of cells over time (6 ROI/device, 3 devices). Data are presented as mean  $\pm$ SD, with \*p<0.05.

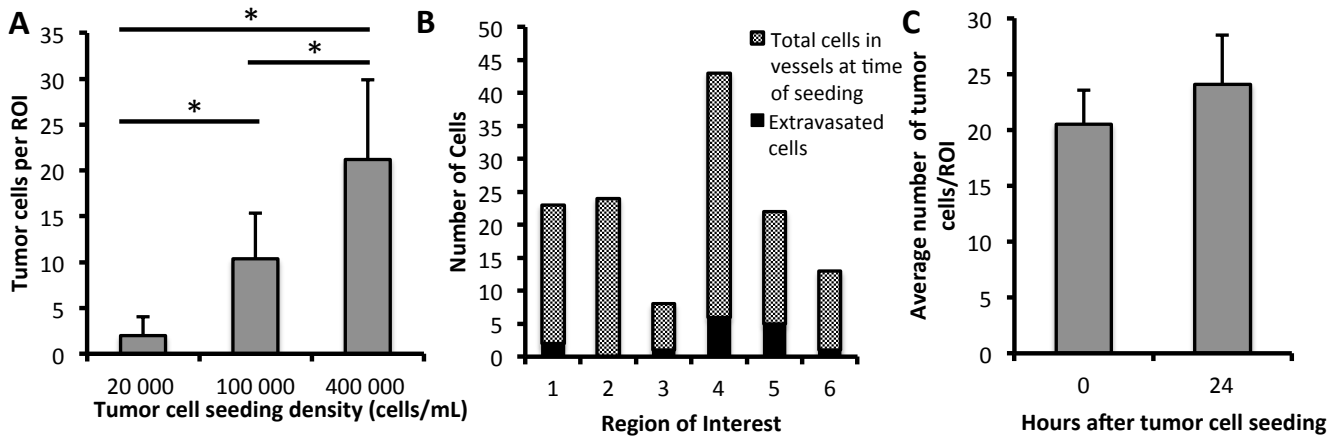

**Figure S2. Extravasation in  $\mu$ VNs.** (A) Tumor cell seeding density versus the number of tumor cells found per ROI (n=18 ROI over 3 devices). (B) Example of the distribution of the number of extravasated cells in different ROIs in a single device. (C) No significant increase in the number of tumor cells from 0 to 24 h is found. Data are presented as mean  $\pm$ SD, with \*p<0.05.

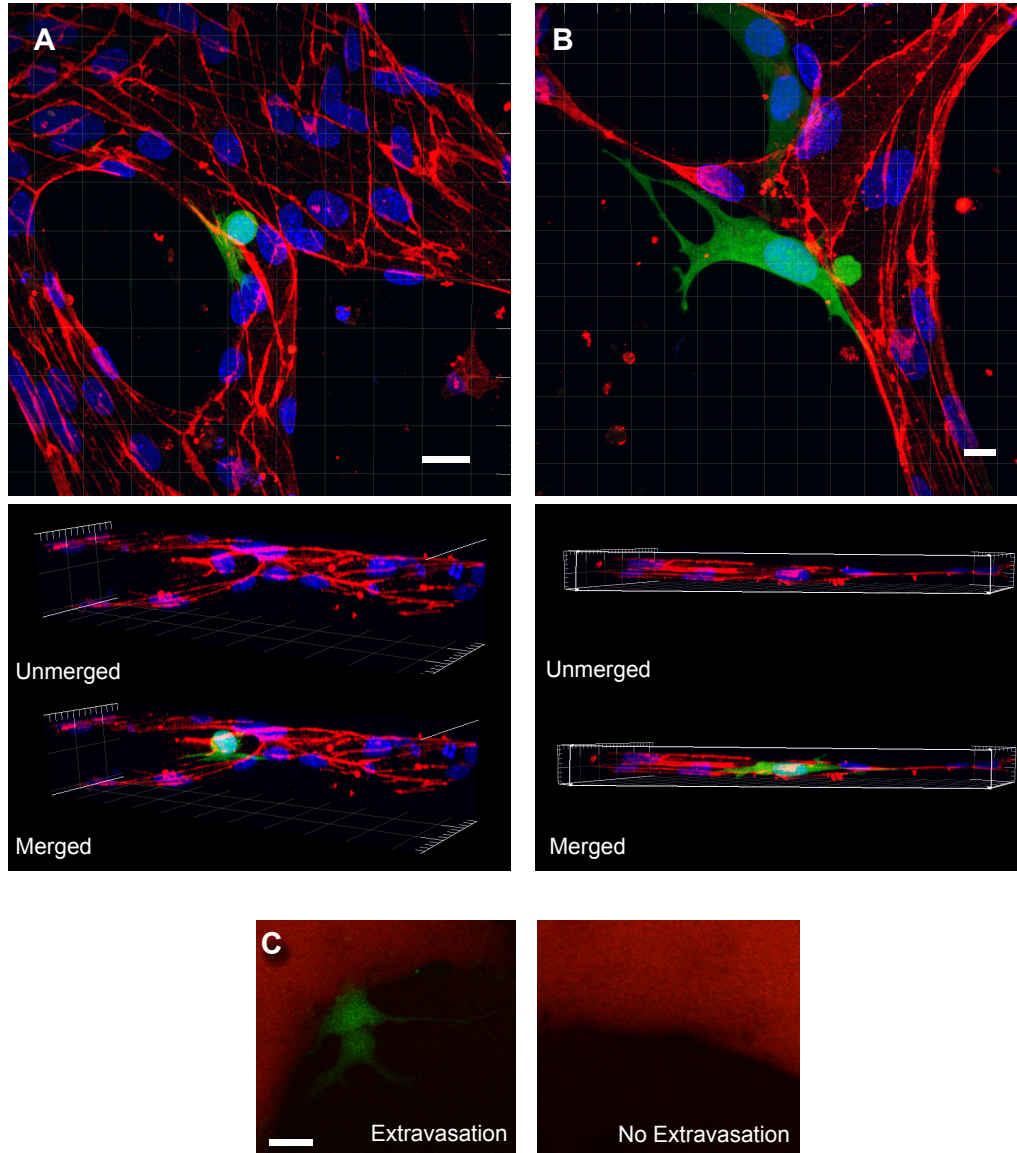

**Figure S3. VE-cadherin staining at extravasation sites.** (A) An MDA-MB-231 cell that has extended protrusions into the subendothelial matrix, before transmigration of the nucleus. Tumor cell (green) protrusions appear localized at EC cell-cell junctions (red). (B) Tumor cell in mid-TEM, after transmigration of the nucleus. Unmerged and merged images of VE-cadherin and tumor cells in all images show indiscernible delocalization in junctional staining. Scale bars are 10  $\mu\text{m}$ . (C) Perfusion with 70-kDa dextran revealed no leaks at the sites of extravasation (red: dextran, green: MDA-MB-231). Scale bar is 20  $\mu\text{m}$ .

***SI Video 1:*** Video of MDA-MB-231 being seeded into the microvascular network via a pressure drop of 5.2 mmH<sub>2</sub>O across the gel region of a device.

***SI Video 2:*** Bright field-fluorescent overlay time-lapse imaging over a period of 24 hours of MDA-MB-231 (green) extravasating from a microvascular network in one region of interest in a device.
